# Supplementary material
Source: PubMed Central journal article supplement (PMC5210184)

Figure S1  
Mendoza et al. 2016

| <b><i>Iron</i></b> | <b><i>Copper</i></b> | <b><i>Zinc</i></b> |
|--------------------|----------------------|--------------------|
| 0.39 µg/g          | 0.01 µg/g            | 0.06 µg/g          |

Figure S2  
Mendoza et al. 2016

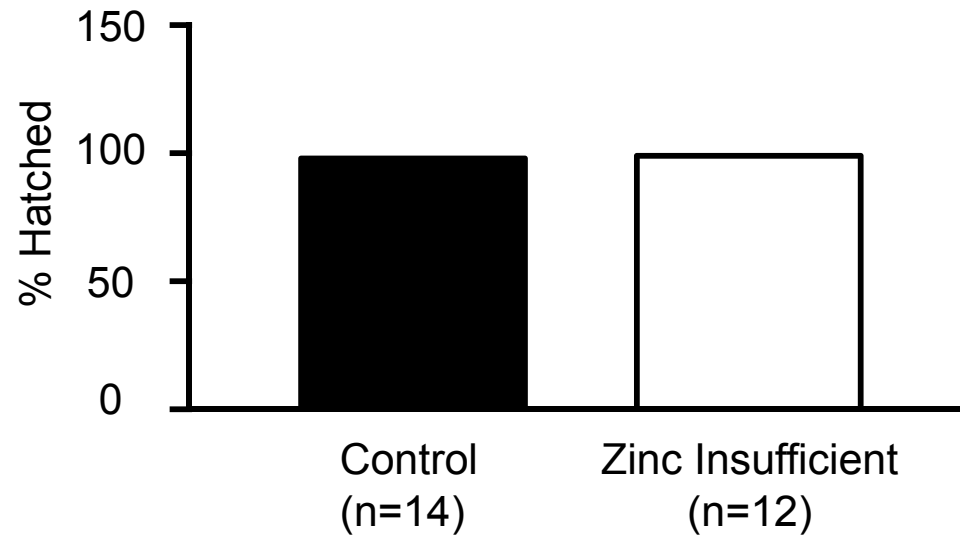

Figure S3  
Mendoza et al.

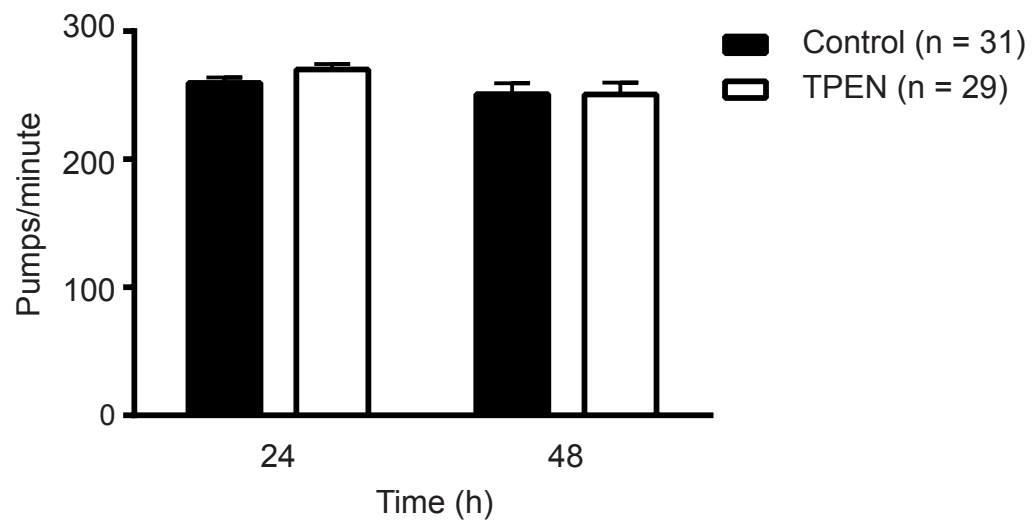

Figure S4  
Mendoza et al.

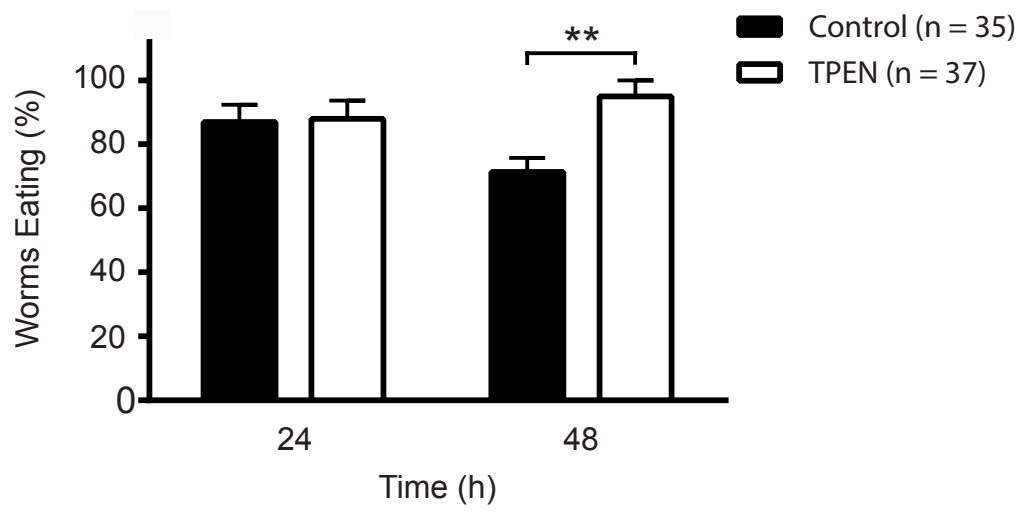

Figure S5  
Mendoza et al.

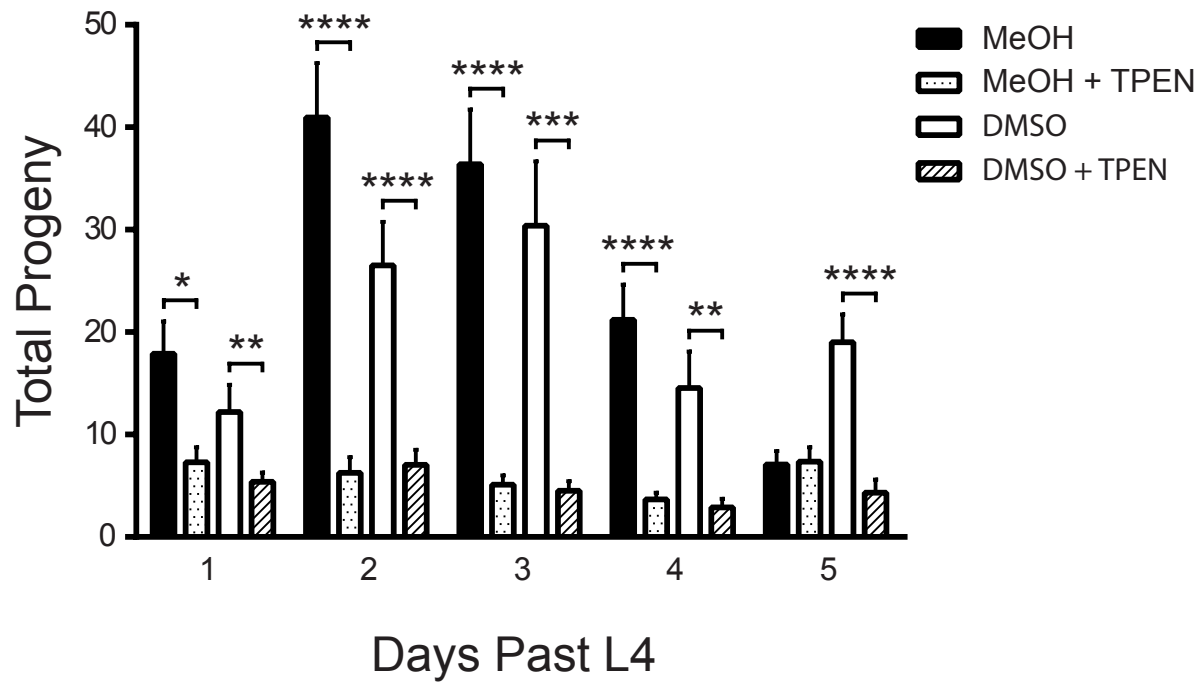

Figure S6  
Mendoza et al.

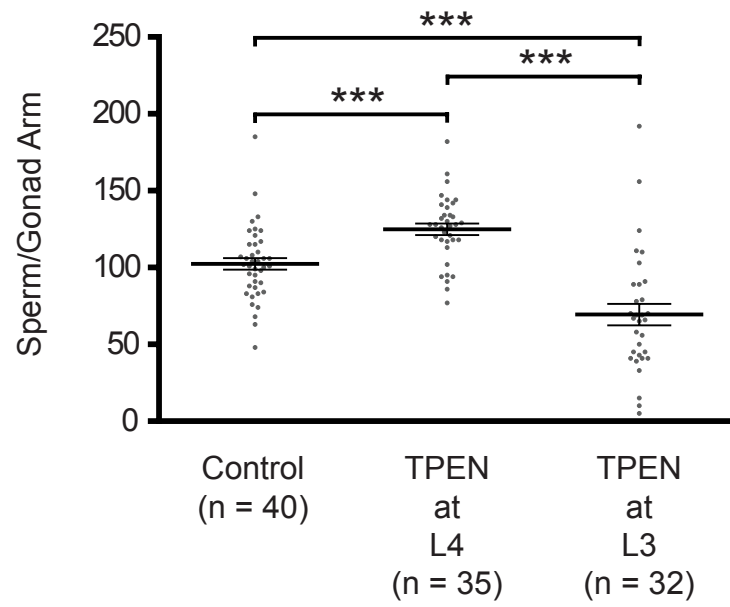

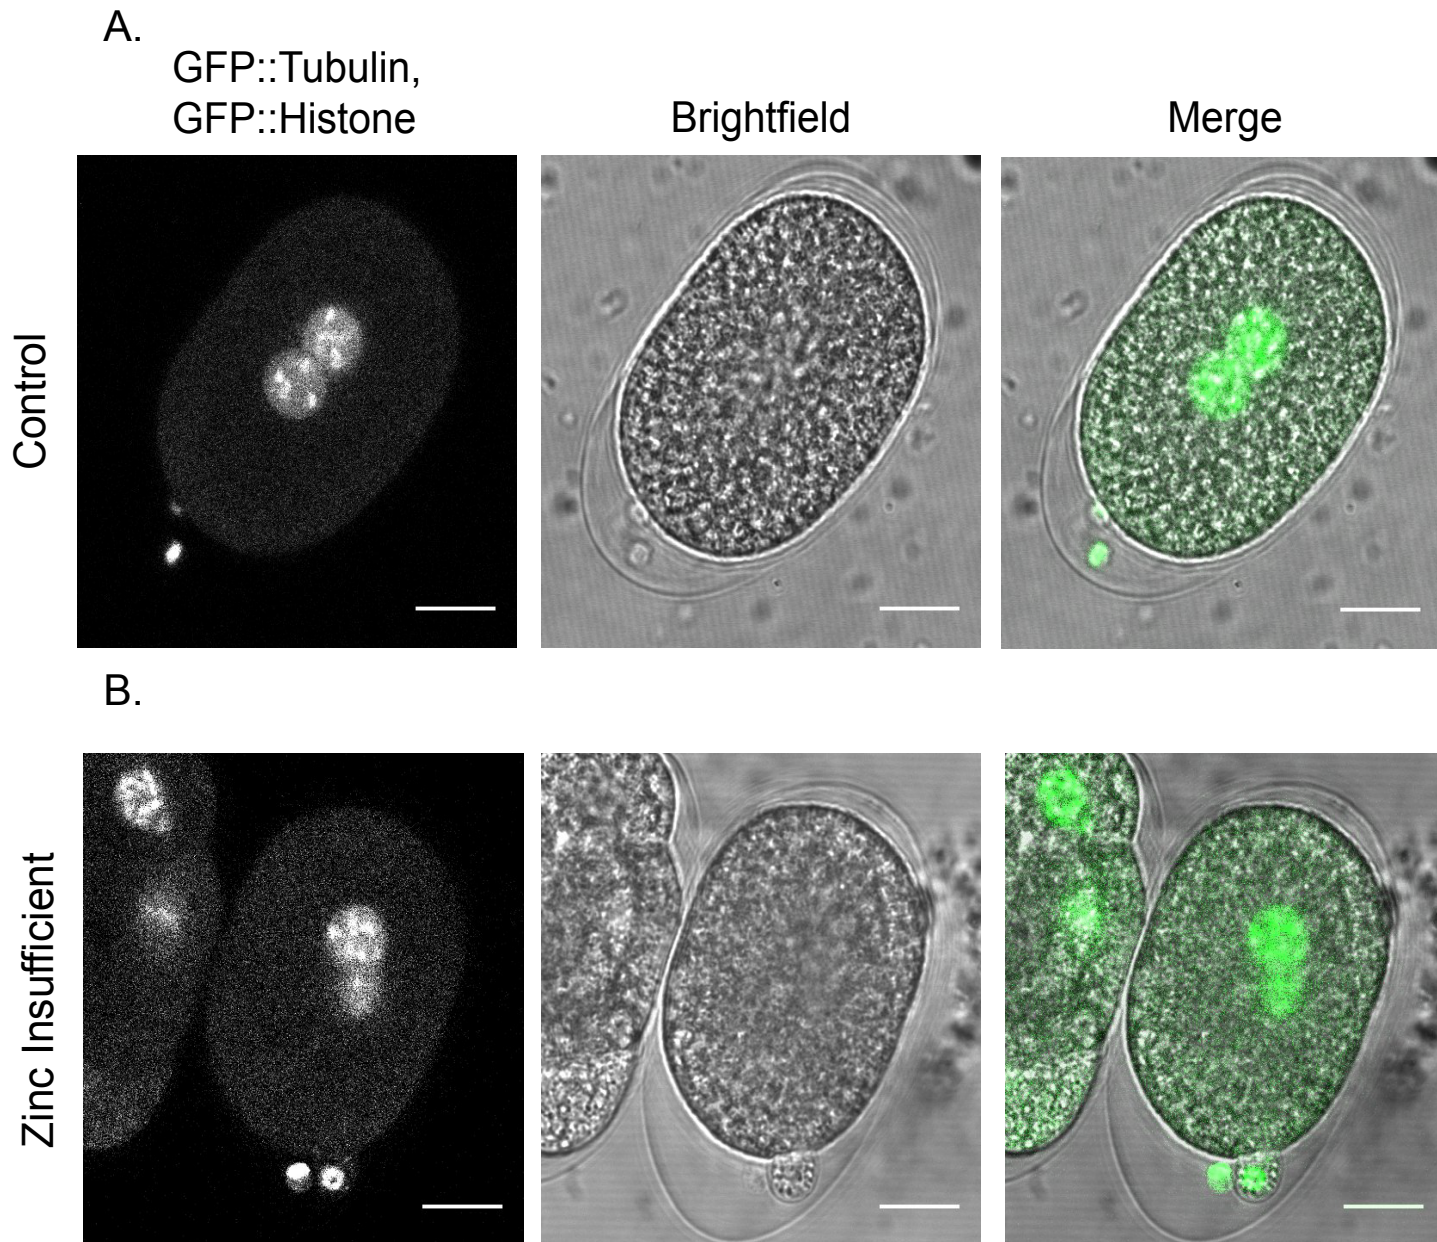

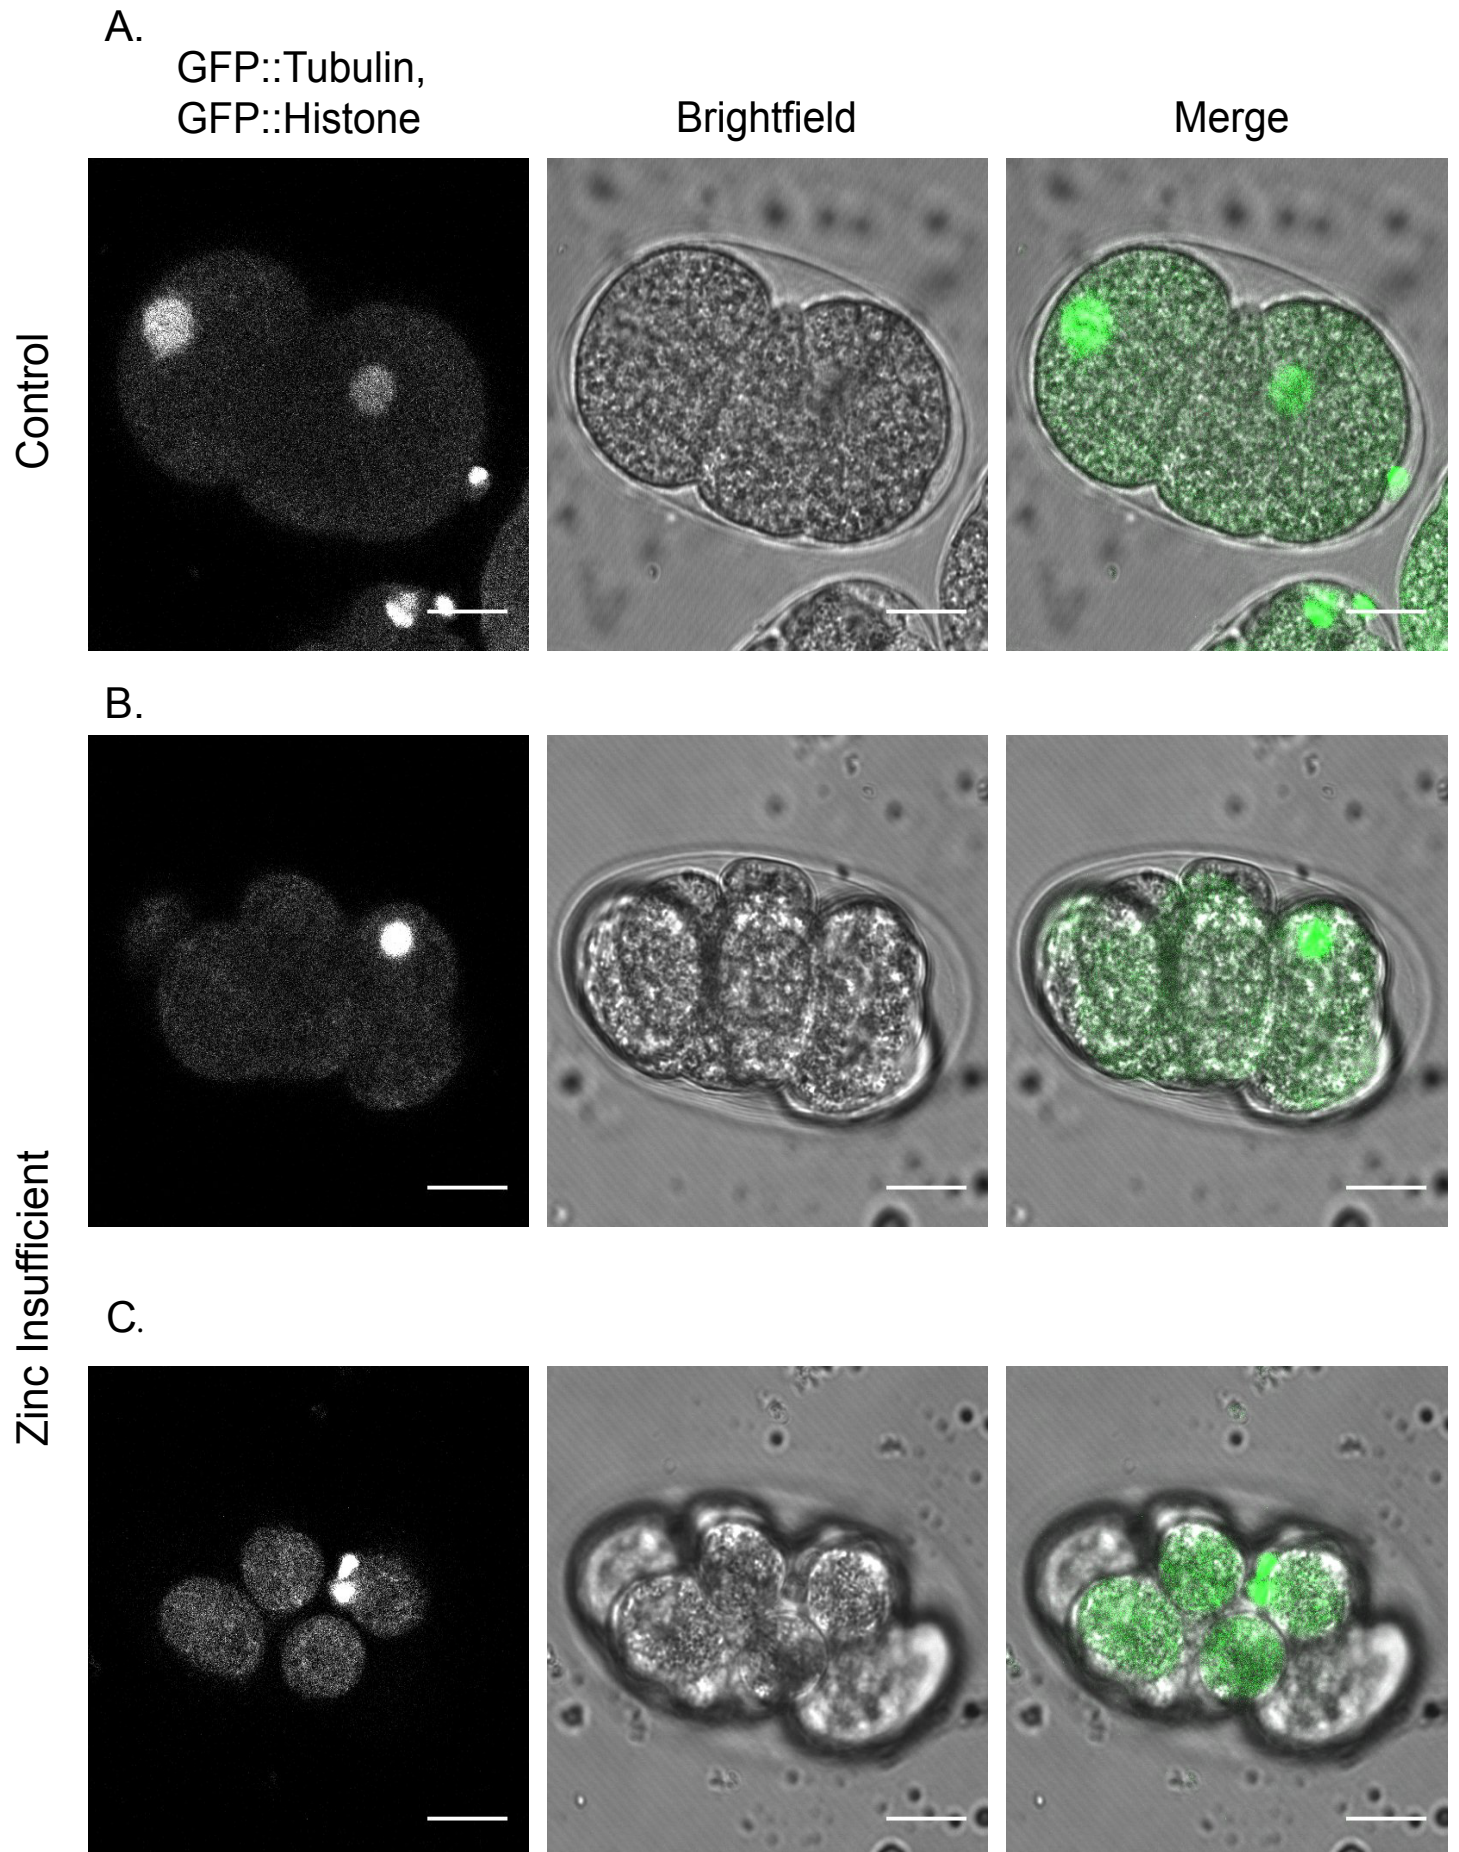

Supplement: NIHMS822861-supplement-1.pdf [file NIHMS822861-supplement-1.pdf]
